# Supplementary material for: Elevated Plasma Bioactive Adrenomedullin and Mortality in Cardiogenic Shock: Results from the OptimaCC Trial
Source: MDPI journal article supplement (doi:10.3390/jcm10194512), 2021-09-29
Supplement: s1 [file s1]

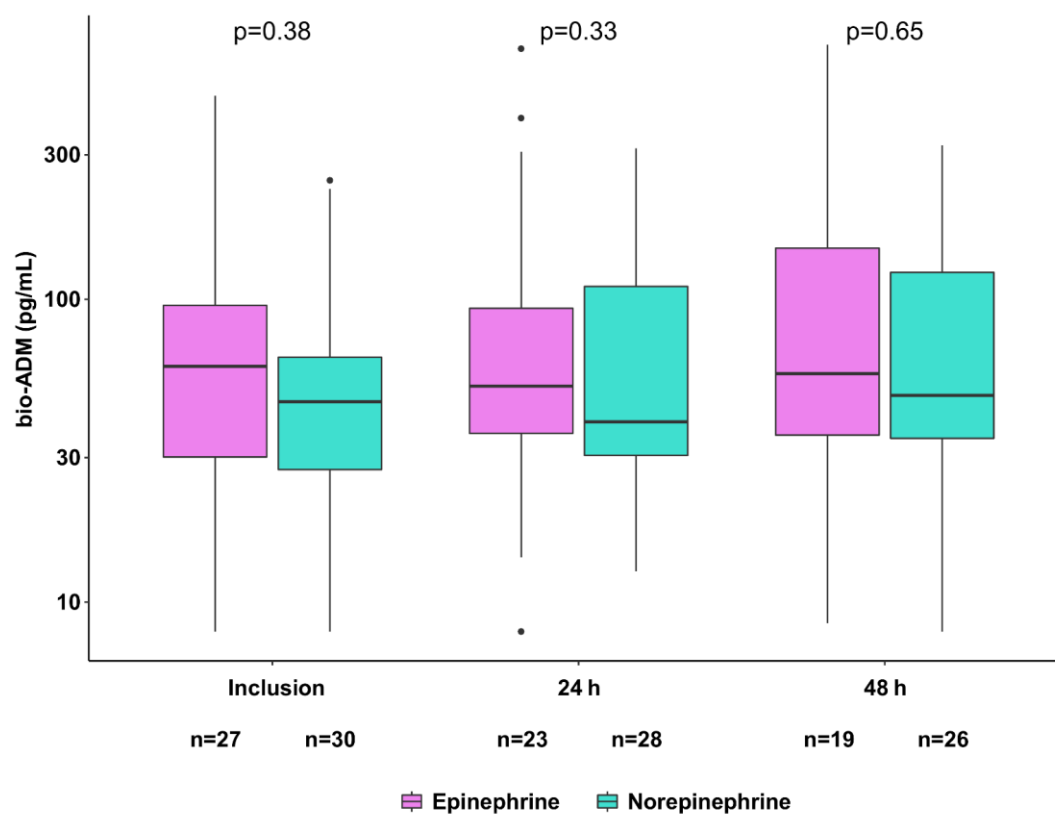

**Figure S1.** Comparison of time-course of bio-ADM, from inclusion to 48 h, between epinephrine group and norepinephrine group. A base-10 log scale is used for the y-axis. Comparisons at each time point were performed using the Kruskal-Wallis test comparing bio-ADM values in epinephrine group versus bio-ADM in norepinephrine group. bio-ADM, bioactive adrenomedullin.

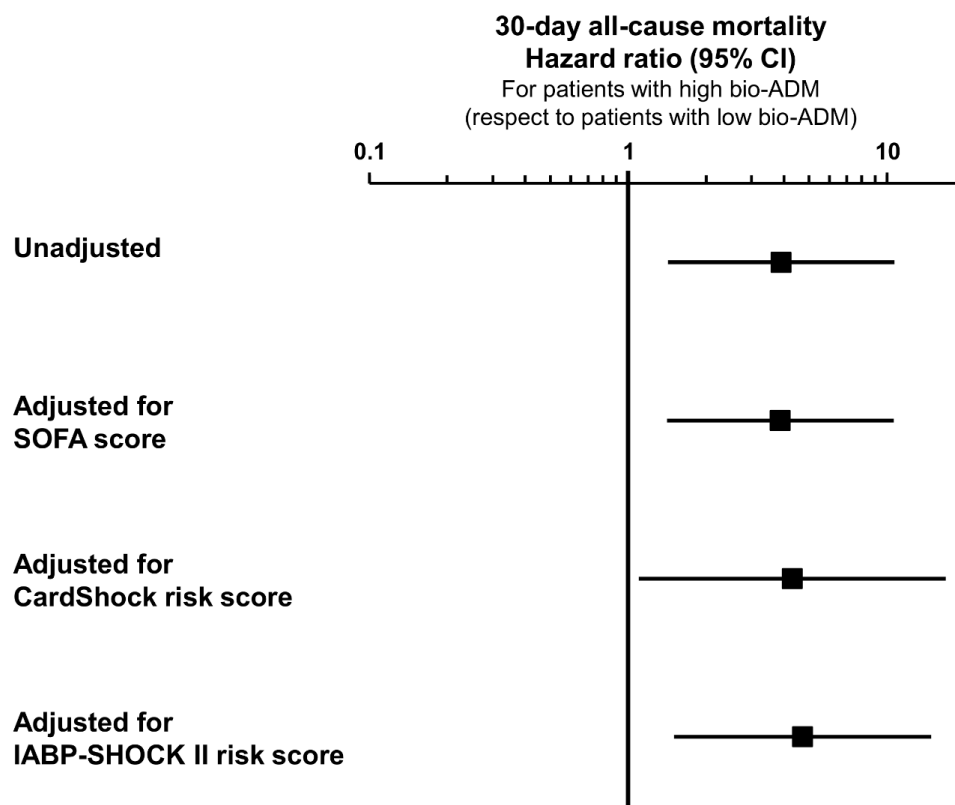

**Figure S2.** Unadjusted and adjusted ratios for high bio-ADM value ( $\geq 53.8$  pg/mL) at inclusion compared with low bio-ADM ( $<53.8$  pg/mL) for outcome: 30-day all-cause mortality. Dichotomization of patients was based on bio-ADM value 53.8 mg/mL, which was the median value of bio-ADM at inclusion (interquartile range 28.5–85.2 pg/mL). bio-ADM, bioactive adrenomedullin; CI, confidence interval; HR, hazard ratio; SOFA score, sequential organ failure assessment score.

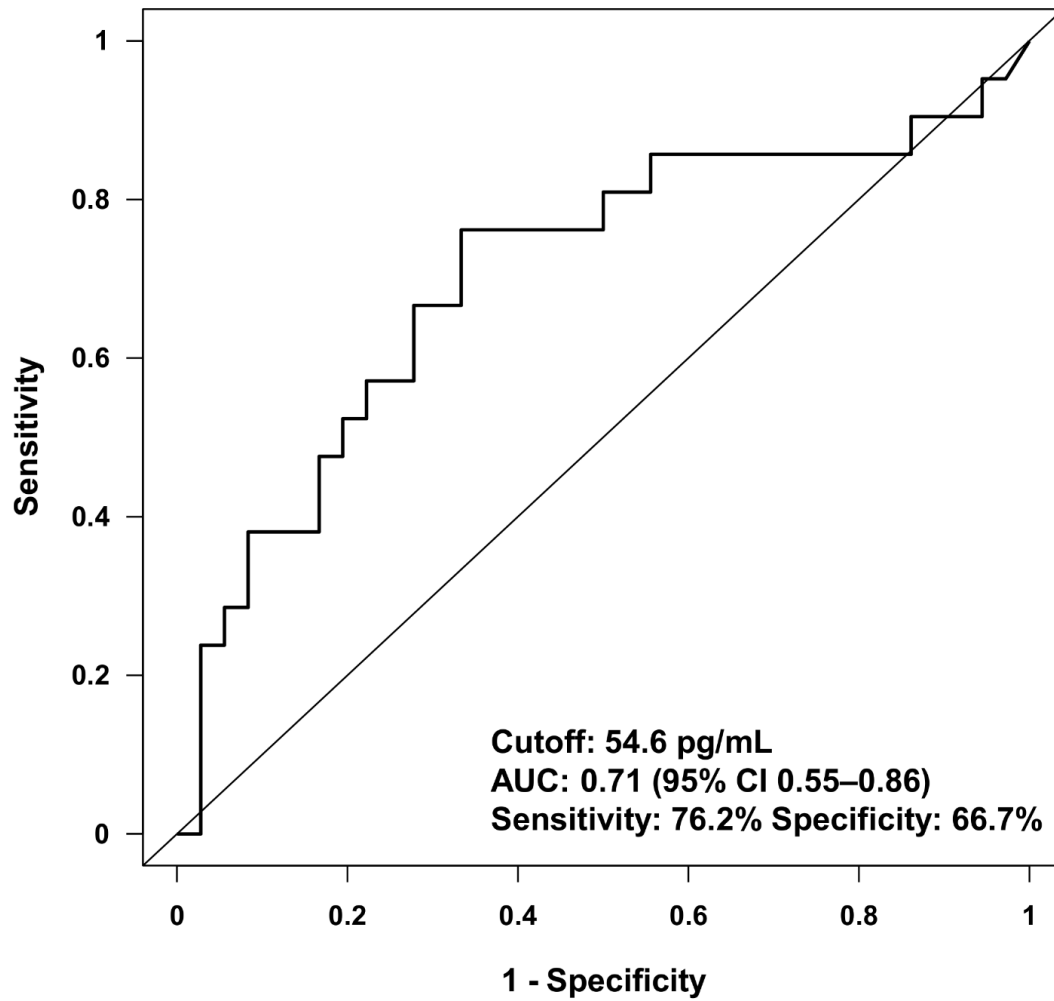

**Figure S3.** Receiver operating characteristic curve for determining the cut-off point of the bio-ADM for 30-day all-cause mortality. AUC, area under the receiver operating characteristic curve; bio-ADM, bioactive adrenomedullin; CI, confidence interval.

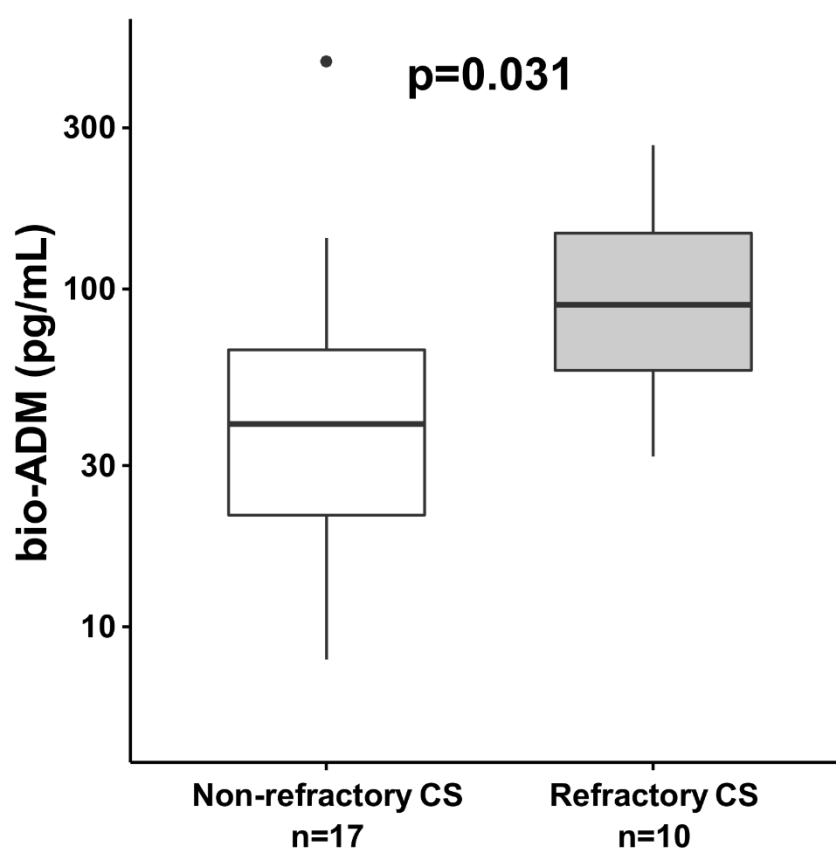

**Figure S4.** The value of bio-ADM at inclusion between patients with and without refractory cardiogenic shock in epinephrine group. bio-ADM, bioactive adrenomedullin; CS, cardiogenic shock.

**Table S1.** Comparison of characteristics of cardiogenic shock patients between high bio-ADM and low bio-ADM groups at inclusion.

| Variables                            | High bio-ADM<br>n = 29 | Low bio-ADM<br>n = 28 | p-value |
|--------------------------------------|------------------------|-----------------------|---------|
| Demographics                         |                        |                       |         |
| Age (years)                          | 75 [67–81]             | 56 [52–67]            | <0.001  |
| Female gender                        | 12 (41)                | 7 (25)                | 0.26    |
| Medical history                      |                        |                       |         |
| Hypertension                         | 10 (34)                | 4 (14)                | 0.12    |
| Diabetes                             | 5 (17)                 | 1 (4)                 | 0.19    |
| Stroke                               | 2 (7)                  | 2 (7)                 | 1.00    |
| Myocardial infarction                | 3 (10)                 | 1 (4)                 | 0.61    |
| Severity scores                      |                        |                       |         |
| SOFA score                           | 10 [8–12]              | 9 [8–11]              | 0.61    |
| CardShock risk score                 | 5 [4–7]                | 4 [3–4]               | 0.003   |
| IABP-SHOCK risk score                | 2 [1–4]                | 1 [0–3]               | 0.070   |
| Clinical presentation at inclusion   |                        |                       |         |
| Body mass index (kg/m <sup>2</sup> ) | 26.6 [23.7–27.6]       | 24.0 [20.8–26.8]      | 0.068   |
| Heart rate (bpm)                     | 96 [84–116]            | 97 [80–106]           | 0.97    |
| Systolic arterial pressure (mmHg)    | 110 [97–116]           | 98 [94–118]           | 0.52    |
| Diastolic arterial pressure (mmHg)   | 55 [46–61]             | 60 [55–69]            | 0.045   |
| Mean arterial pressure (mmHg)        | 70 [63–80]             | 72 [69–89]            | 0.12    |
| SvO <sub>2</sub> (%)                 | 69 [57–76]             | 73 [66–80]            | 0.084   |

|                                   |                   |                  |        |
|-----------------------------------|-------------------|------------------|--------|
| Mechanical ventilation            | 20 (83)           | 26 (96)          | 0.17   |
| LVEF (%)                          | 32 [24–45]        | 37 [29–40]       | 0.36   |
| Laboratory findings at inclusion  |                   |                  |        |
| eGFR (mL/min/1.73m <sup>2</sup> ) | 39.8 [31.1–49.0]  | 69.5 [53.3–90.5] | <0.001 |
| AST (UI/L)                        | 456 [143–1076]    | 471 [251–704]    | 0.99   |
| ALT (UI/L)                        | 144 [68–322]      | 149 [80–210]     | 0.94   |
| NT-proBNP (pg/mL)                 | 7543 [4427–20766] | 702 [375–1782]   | <0.001 |
| hs-TnT (pg/mL)                    | 8.7 [2.3–33.8]    | 6.9 [2.9–17.9]   | 0.54   |
| Lactate (mmol/L)                  | 4.6 [2.9–5.8]     | 2.9 [1.9–5.4]    | 0.08   |
| Adverse events in ICU             |                   |                  |        |
| Refractory cardiogenic shock      | 10 (34)           | 2 (7)            | 0.021  |
| Arrhythmias                       | 13 (45)           | 8 (29)           | 0.27   |
| MCS implantation                  | 2 (7)             | 2 (7)            | 1.00   |

Data are presented as median [interquartile range] or *n* (%). High bio-ADM corresponds to bio-ADM  $\geq$  53.8 pg/mL (median) and low bio-ADM corresponds to  $<$  53.8 pg/mL. Arrhythmias indicates ventricular tachycardia, ventricular fibrillation, or atrial fibrillation. AST, aspartate transaminase; ALT, alanine transaminase; eGFR, estimated glomerular filtration rate; hs-TnT, high-sensitive troponin T; IABP-SHOCK II, intra-aortic balloon pump in cardiogenic shock II; IQR, interquartile range; LVEF, left ventricular ejection fraction; MCS, mechanical circulatory support; NT-proBNP, N-terminal pro-B-type natriuretic peptide; SOFA, sequential organ failure assessment; SvO<sub>2</sub>, mixed venous oxygen saturation.

**Table S2.** ROC curve analysis.

| Model               | AUC  | 95% CI (AUC) | Sensitivity (%) | Specificity (%) | <i>p</i> -value |
|---------------------|------|--------------|-----------------|-----------------|-----------------|
| bio-ADM             | 0.71 | 0.55–0.86    | 76.2            | 66.7            | Reference       |
| bio-ADM + NT-proBNP | 0.73 | 0.58–0.87    | 66.7            | 74.3            | 0.69            |
| bio-ADM + eGFR      | 0.72 | 0.57–0.86    | 89.5            | 51.5            | 0.96            |
| bio-ADM + lactate   | 0.73 | 0.58–0.88    | 66.7            | 75.0            | 0.81            |

AUC, area under the curve; bio-ADM, bioactive adrenomedullin; CI, confidence interval; eGFR, estimated glomerular filtration rate; NT-proBNP, N-terminal pro-B-type natriuretic peptide; ROC, receiver operating characteristic.
